# Supplementary material for: Self-sorting behavior in supramolecular fullerene polymerization directed by host–guest complexation between calix[5]arene and C60
Source: Royal Society of Chemistry journal article supplement (doi:10.1039/d1cc05118k), 2021-01-01
Supplement: d1cc05118k1.pdf [file d1cc05118k1.pdf]

Supporting Information For:

## **Self-Sorting Behavior in Supramolecular Fullerene Polymerization Directed by Host-Guest Complexation between Calix[5]arene and C<sub>60</sub>**

Takehiro Hirao,<sup>‡</sup> Naoka Fujii,<sup>‡</sup> Yoshiki Iwabe and Takeharu Haino\*

Department of Chemistry, Graduate School of Advanced Science and Engineering, Hiroshima University, 1-3-1

Kagamiyama, Higashi-Hiroshima, Hiroshima, 739-8526, JAPAN

To whom correspondence should be addressed: \*E-mail: [haino@hiroshima-u.ac.jp](mailto:haino@hiroshima-u.ac.jp)

<sup>‡</sup>These two authors contributed equally.

## Contents

|                                                                                                                    |         |
|--------------------------------------------------------------------------------------------------------------------|---------|
| <b>General</b> .....                                                                                               | S3      |
| <b>Method</b> .....                                                                                                | S3-S4   |
| <b>Figure S1-S9.</b> DOSY experiments for 1:1 mixtures of ( <i>rac</i> )- <b>1</b> and <b>2</b> .....              | S5-S9   |
| <b>Figure S10.</b> DOSY analysis for 1:1 mixtures of ( <i>rac</i> )- <b>1</b> and <b>2</b> .....                   | S10     |
| <b>Figure S11.</b> CD spectra of mixtures of <b>1</b> and <b>2</b> .....                                           | S11     |
| <b>Figure S12.</b> Summary of <i>D</i> values of 1:1 mixtures of ( <i>R:S = 1:3</i> )- <b>1</b> and <b>2</b> ..... | S11     |
| <b>Figure S13-S15.</b> DOSY experiments for 1:1 mixtures of ( <i>R:S = 1:3</i> )- <b>1</b> and <b>2</b> .....      | S12-S13 |
| <b>Figure S16.</b> DOSY analysis for 1:1 mixtures of ( <i>R:S = 1:3</i> )- <b>1</b> and <b>2</b> .....             | S13     |
| <b>Figure S17.</b> DOSY analysis for 1:1 mixtures of ( <i>rac</i> )- <b>1</b> and <b>3</b> .....                   | S14     |
| <b>Figure S18.</b> Determination of binding constants between ( <i>S</i> )- <b>4</b> and <b>2</b> .....            | S15     |
| <b>Figure S19.</b> Determination of binding constants between ( <i>S</i> )- <b>1</b> and <b>5</b> .....            | S16     |
| <b>References</b> .....                                                                                            | S17     |

**General:**

All solvents were commercial reagent grade and were used without further purification. UV/vis absorption spectra were recorded on a JASCO V-560 spectrometer. DOSY experiments were carried out on JEOL JNM-ECA500 spectrometer, and chemical shifts were reported on the delta scale in ppm relative to residual chloroform ( $\delta = 7.26$  for  $^1\text{H}$ ). Circular dichroism (CD) spectra were recorded on a JASCO J-1500 spectrometer. Previously synthesized (S)-**1**,<sup>[1]</sup> (R)-**1**,<sup>[1]</sup> **2**,<sup>[1]</sup> **3**,<sup>[2]</sup> (S)-**4**,<sup>[3]</sup> and **5**<sup>[3]</sup> were used for this work.

**Method:**

*Determination of affinity constants corresponding to the interaction between the calix[5]arene moiety of (rac)-1 and the fullerene moiety of 2.*

A hyperbolic curve was obtained by plotting the total concentrations of 1:1 mixtures of (rac)-**1** and **2** against the extinction coefficients ( $\epsilon$ ). Curve fitting analysis was carried out using Igor pro program. The fitting functions are given by eq. S1,

$$\epsilon(C_t) = \frac{KC_t + 1 - \sqrt{2KC_t + 1}}{K^2C_t^2}(\epsilon_1 - \epsilon_a) + \epsilon_a \#(S1)$$

where  $C_t$ ,  $K$ ,  $\epsilon_1$ , and  $\epsilon_a$  indicate the total concentration of the compound, the affinity constant, the  $\epsilon$  of the monomer, the  $\epsilon$  of the aggregates, respectively.<sup>[4]</sup>

*Determination of diffusion coefficients of the existing molecular species in solutions.*

Chloroform-*d* solutions of a 1:1 mixture of (rac)-**1** and **2** were placed in an NMR sample tube (3 mm $\Phi$ ). The pulse-field gradient diffusion NMR spectra were recorded using a bipolar pulse pair stimulated echo pulse sequence on a JEOL JNM-ECA500 spectrometer with a three mm inverse H3X/FG probe at 24 °C. The resulting DOSY data were analyzed using a MestReNova program to obtain the diffusion coefficient values shown in Table 1 and Fig. S10. The signal decay of selected aliphatic protons was fit to fitting functions given by eq. S2, where  $I$  and  $I_0$  indicate the NMR signal intensities in the presence and absence of gradient pulses, respectively.  $D$  is the diffusion coefficient value.

$$I = I_0 e^{-x D} \#(S2)$$

The  $x$  denotes  $[-\gamma^2 g^2 \delta^2 (A - \delta/3)]$ , where  $\gamma$ ,  $g$ ,  $\delta$ , and  $A$  represent the gyromagnetic ratio, gradient strength, its duration, and separation between the edges of the gradient pulses, respectively.<sup>[5]</sup>

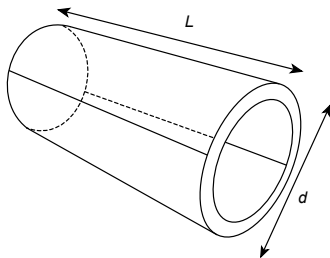

*Determination of degree of polymerization (DP) by a cylindrical model.*<sup>[6]-[11]</sup>

According to a cylindrical mode, diffusion coefficient ( $D$ ) can be expressed by eq. S3.

$$D = \frac{k_B T}{3\pi\eta L} (\ln p + \nu) \quad (S3)$$

$k_B$ ,  $T$ ,  $\eta$ , and  $L$  are the Boltzmann constant, temperature, solvent viscosity, and length of the cylinder.  $p$  indicates the axial ratio of the cylinder ( $p = L/d$ ).  $\nu$  is the end-effect correction term, which was approximated as follows:

$$\nu = 0.312 + 0.565p^{-1} - 0.100p^{-2} \quad (S4)$$

We previously estimated the  $d$  value of the supramolecular polymers from the molecular model to be 3.6 nm.<sup>[1]</sup> The eqs. S3 and S4 allowed to calculate the  $L$  values of the supramolecular polymers using the  $D$  values obtained experimentally (Fig. S10). Finally, the DP values were estimated based on a length of 5.1 nm for one helix turn (Table 1).

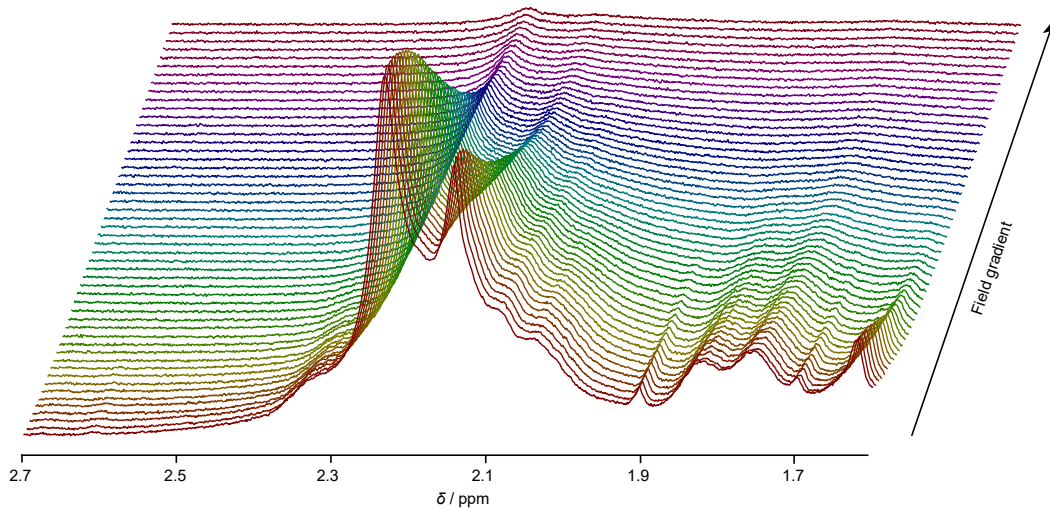

**Figure S1.** Stack plot of  $^1\text{H}$  NMR spectra obtained from the diffusion experiment for a 1:1 mixture of (*rac*)-**1** and **2** in chloroform-*d* at the concentration of  $30 \text{ mmol L}^{-1}$ , showing the methyl protons of calix[5]arene moieties of (*rac*)-**1**.

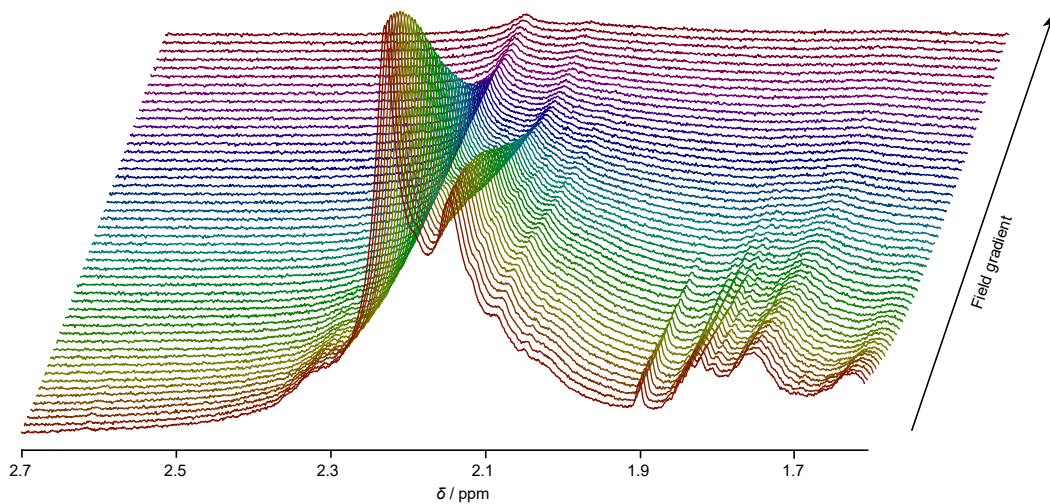

**Figure S2.** Stack plot of  $^1\text{H}$  NMR spectra obtained from the diffusion experiment for a 1:1 mixture of (*rac*)-**1** and **2** in chloroform-*d* at the concentration of  $25 \text{ mmol L}^{-1}$ , showing the methyl protons of calix[5]arene moieties of (*rac*)-**1**.

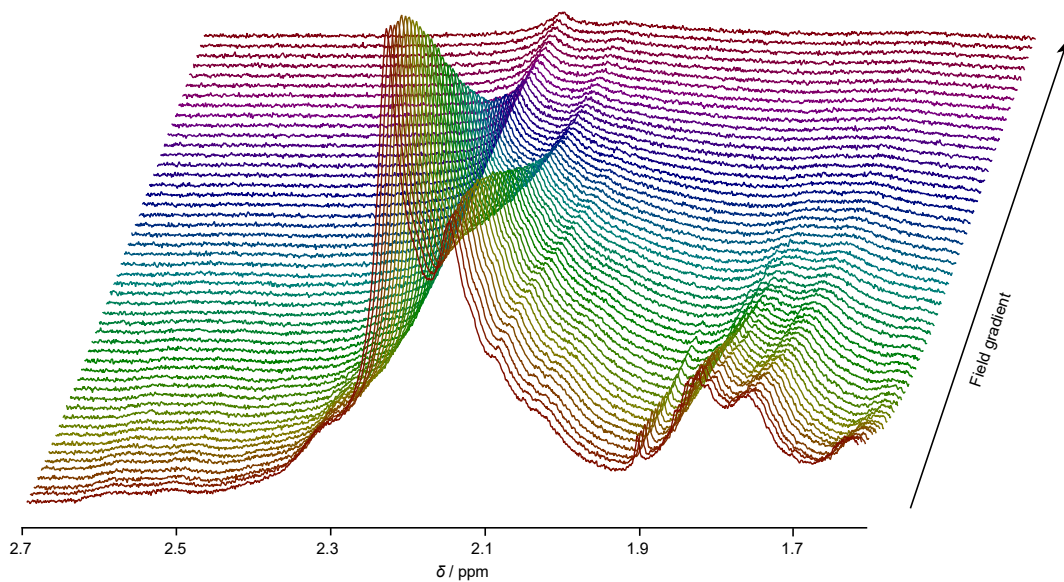

**Figure S3.** Stack plot of <sup>1</sup>H NMR spectra obtained from the diffusion experiment for a 1:1 mixture of (*rac*)-1 and 2 in chloroform-*d* at the concentration of 20 mmol L<sup>-1</sup>, showing the methyl protons of calix[5]arene moieties of (*rac*)-1.

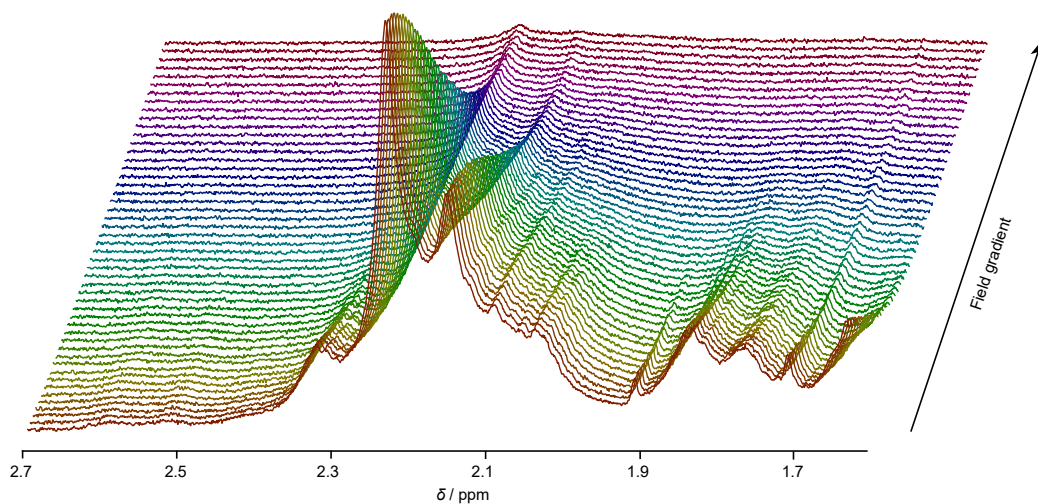

**Figure S4.** Stack plot of <sup>1</sup>H NMR spectra obtained from the diffusion experiment for a 1:1 mixture of (*rac*)-1 and 2 in chloroform-*d* at the concentration of 15 mmol L<sup>-1</sup>, showing the methyl protons of calix[5]arene moieties of (*rac*)-1.

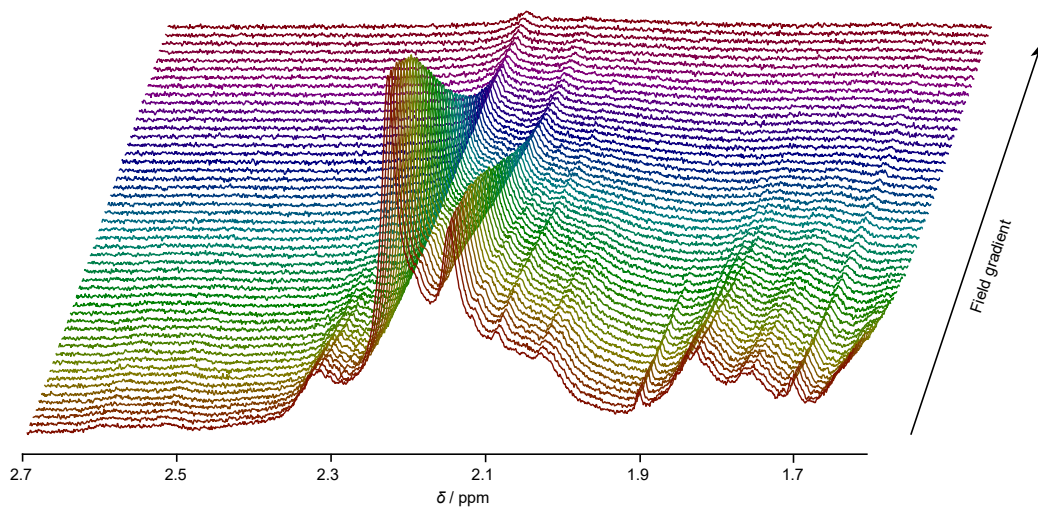

**Figure S5.** Stack plot of  $^1\text{H}$  NMR spectra obtained from the diffusion experiment for a 1:1 mixture of (*rac*)-1 and 2 in chloroform-*d* at the concentration of  $10 \text{ mmol L}^{-1}$ , showing the methyl protons of calix[5]arene moieties of (*rac*)-1.

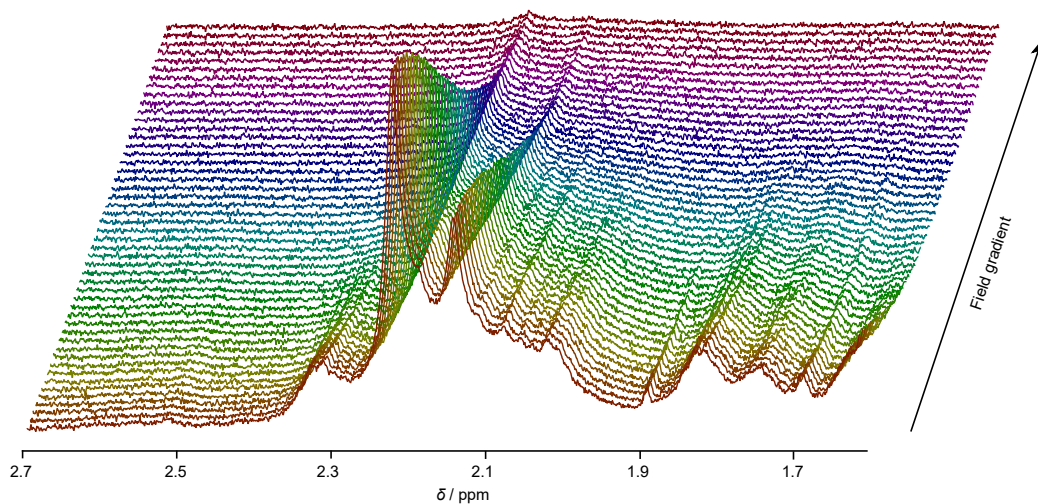

**Figure S6.** Stack plot of  $^1\text{H}$  NMR spectra obtained from the diffusion experiment for a 1:1 mixture of (*rac*)-1 and 2 in chloroform-*d* at the concentration of  $7.0 \text{ mmol L}^{-1}$ , showing the methyl protons of calix[5]arene moieties of (*rac*)-1.

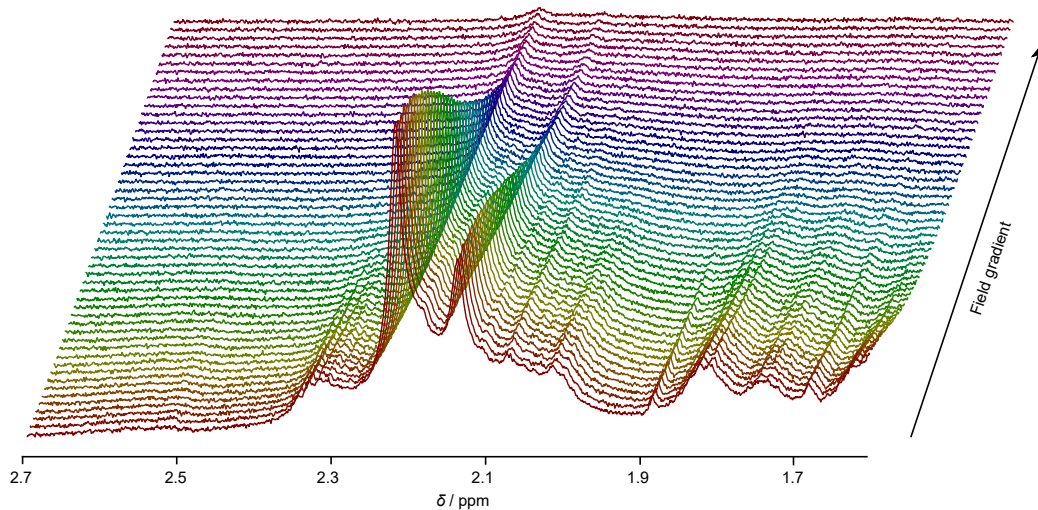

**Figure S7.** Stack plot of <sup>1</sup>H NMR spectra obtained from the diffusion experiment for a 1:1 mixture of (*rac*)-**1** and **2** in chloroform-*d* at the concentration of 5.0 mmol L<sup>-1</sup>, showing the methyl protons of calix[5]arene moieties of (*rac*)-**1**.

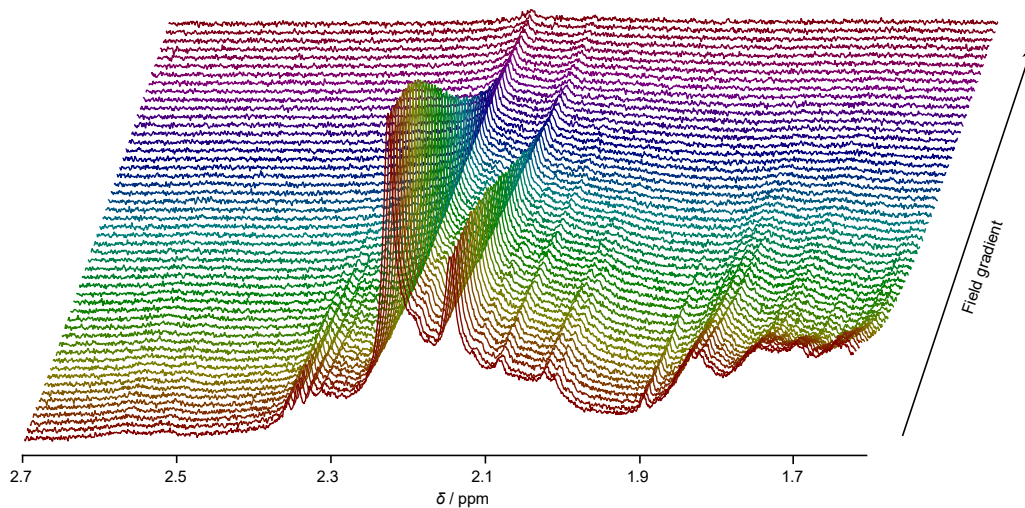

**Figure S8.** Stack plot of <sup>1</sup>H NMR spectra obtained from the diffusion experiment for a 1:1 mixture of (*rac*)-**1** and **2** in chloroform-*d* at the concentration of 2.5 mmol L<sup>-1</sup>, showing the methyl protons of calix[5]arene moieties of (*rac*)-**1**.



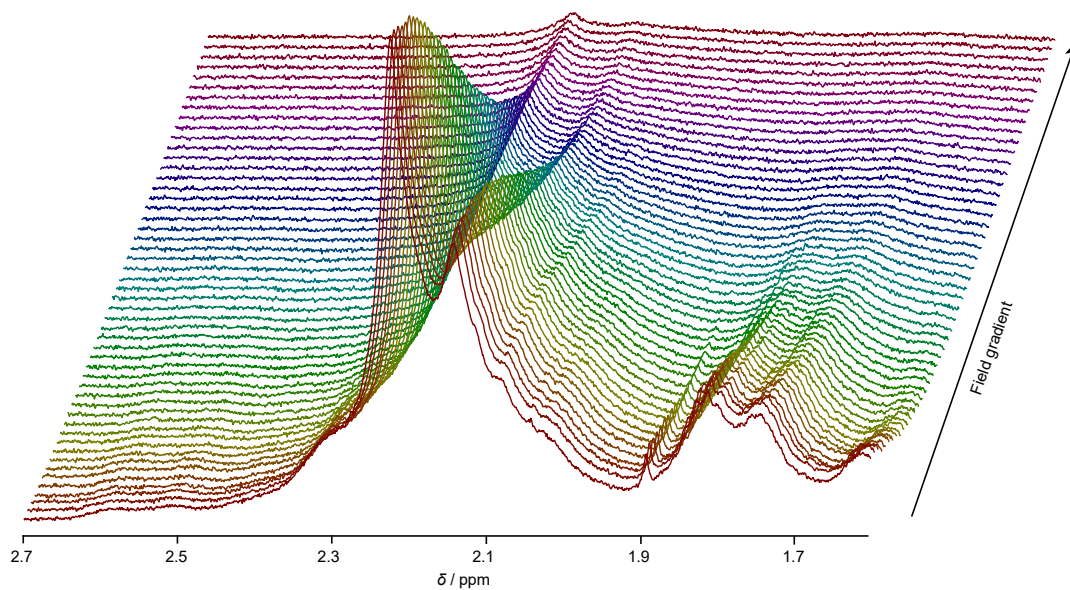

**Figure S9.** Stack plot of  $^1\text{H}$  NMR spectra obtained from the diffusion experiment for a 1:1 mixture of (*rac*)-**1** and **2** in chloroform-*d* at the concentration of  $1.0 \text{ mmol L}^{-1}$ , showing the methyl protons of calix[5]arene moieties of (*rac*)-**1**.

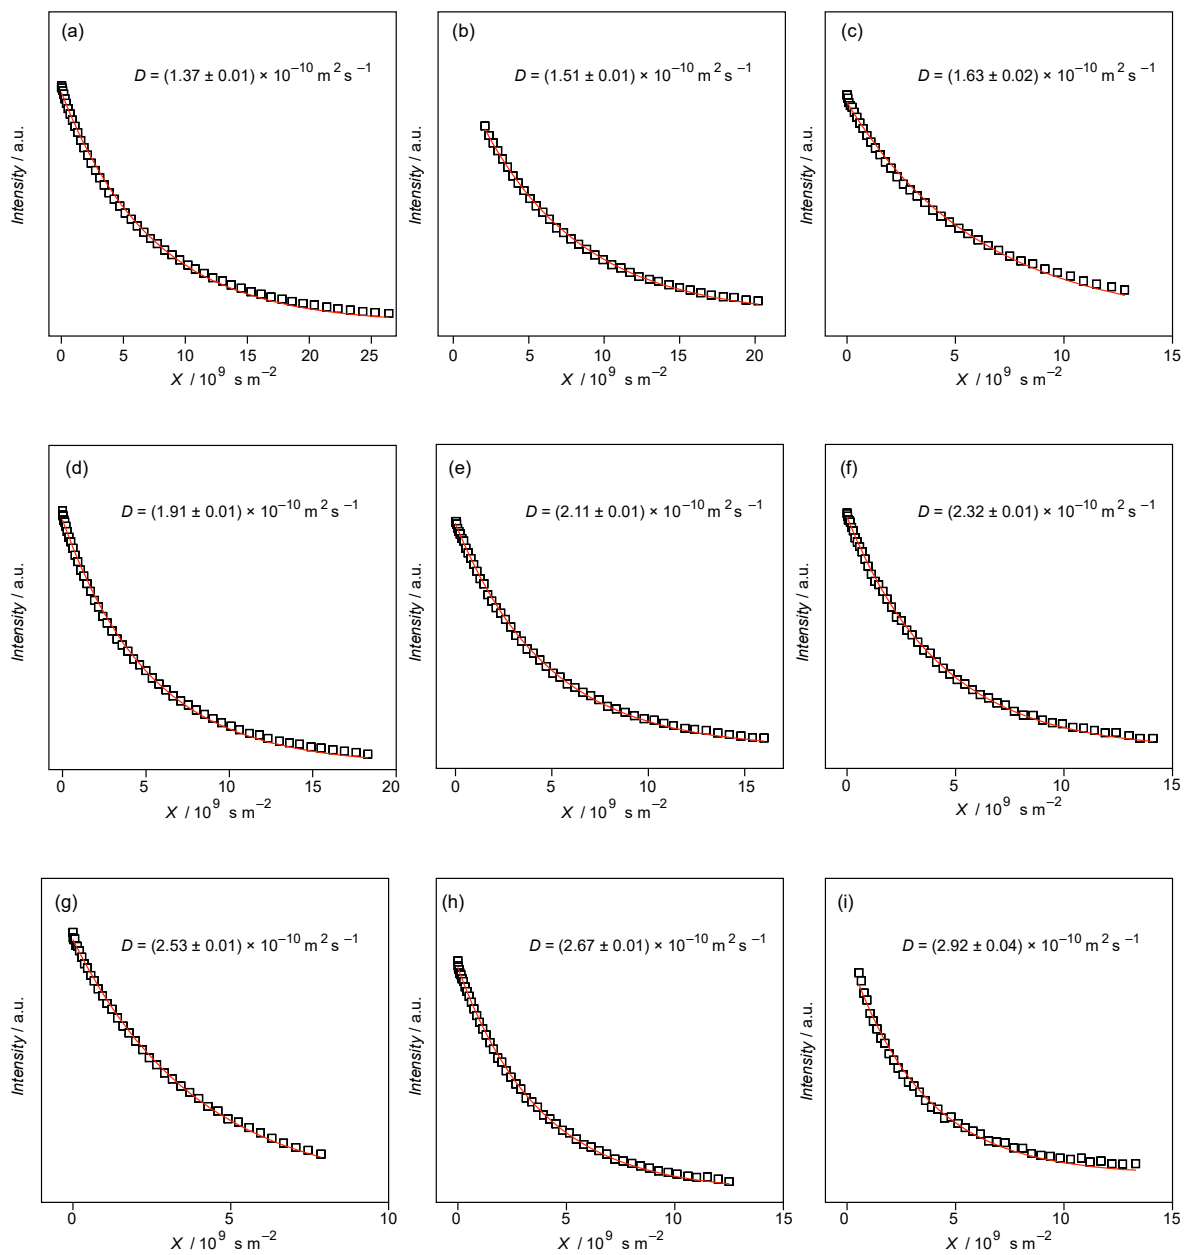

**Figure S10.** Plot of <sup>1</sup>H NMR signal intensities obtained from the diffusion experiments (Figs. S1-S9) and their fitting curves (red lines) for a 1:1 mixture of (*rac*)-**1** and **2** in chloroform-*d* at the concentrations of (a) 30, (b) 25, (c) 20, (d) 15, (e) 10, (f) 7.0, (g) 5.0, (h) 2.5, and (i) 1.0 mmol L<sup>-1</sup>.

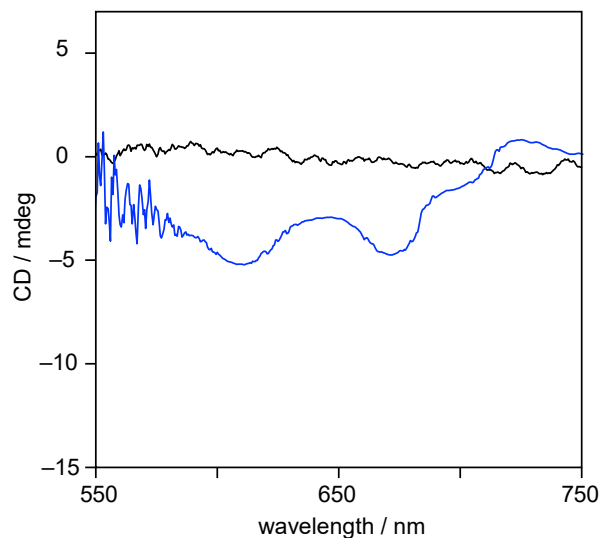

**Figure S11.** CD spectra of (blue line) a 1:1 mixture of (*S*)-**1** ( $1.0 \times 10^{-2} \text{ mol L}^{-1}$ ) and **2** ( $1.0 \times 10^{-2} \text{ mol L}^{-1}$ ), and (solid line) a 1:1 mixture of (*S*)-**1** ( $1.0 \times 10^{-2} \text{ mol L}^{-1}$ ) and **2** ( $1.0 \times 10^{-2} \text{ mol L}^{-1}$ ) with (*R*)-**1** ( $0.50 \times 10^{-2} \text{ mol L}^{-1}$ ) in toluene at 5 °C. The spectrum shown in blue line is from Ref. [1] with permission of the publisher.

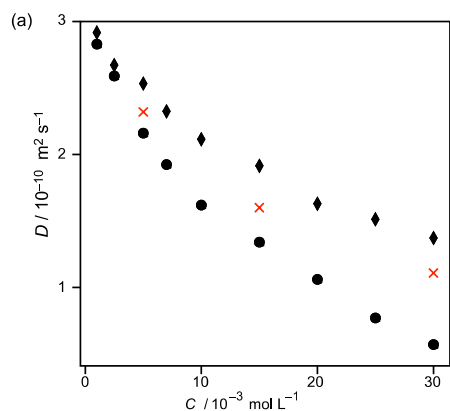

(b)

|                                            | <i>C</i> (mmol L <sup>-1</sup> )                                          | 5.0              | 15               | 30   |
|--------------------------------------------|---------------------------------------------------------------------------|------------------|------------------|------|
| <i>(R)</i> - <b>1</b> and <b>2</b>         | <i>D</i> (10 <sup>-10</sup> m <sup>2</sup> s <sup>-1</sup> ) <sup>a</sup> | 2.16             | 1.34             | 0.57 |
|                                            | DP <sup>b</sup>                                                           | --- <sup>c</sup> | 7                | 32   |
| <i>(R:S = 1:3)</i> - <b>1</b> and <b>2</b> | <i>D</i> (10 <sup>-10</sup> m <sup>2</sup> s <sup>-1</sup> ) <sup>a</sup> | 2.37             | 1.59             | 1.11 |
|                                            | DP <sup>b</sup>                                                           | --- <sup>c</sup> | 4                | 10   |
| <i>(rac)</i> - <b>1</b> and <b>2</b>       | <i>D</i> (10 <sup>-10</sup> m <sup>2</sup> s <sup>-1</sup> ) <sup>a</sup> | 2.67             | 1.91             | 1.37 |
|                                            | DP <sup>b</sup>                                                           | --- <sup>c</sup> | --- <sup>c</sup> | 7    |

**Figure S12.** (a) Plot of diffusion coefficients (*D*s) of a 1:1 mixture of (*R*)-**1** and **2** (circle), a 0.25:0.75:1 mixture of (*R*)-**1**, (*S*)-**1** and **2** (cross), and a 1:1 mixture of (*rac*)-**1** and **2** (rhombus) in chloroform-*d* at 25 °C. The *D* values of a 1:1 mixture of (*R*)-**1** and **2** are from Ref.[1] with permission of the publisher. (b) Summary of diffusion coefficient (*D*) and the degree of polymerization (DP) values at various concentrations. The spectra and fitting analysis are shown in Figs. S1-S10, S13-S16. <sup>a</sup>Observed at 25 °C. Estimated error in *D* < 10%. The error values are shown in Figs. S10 and S16. <sup>b</sup>Estimated by a cylindrical model. <sup>c</sup>Shorter than one-helix turn (DP < 4).

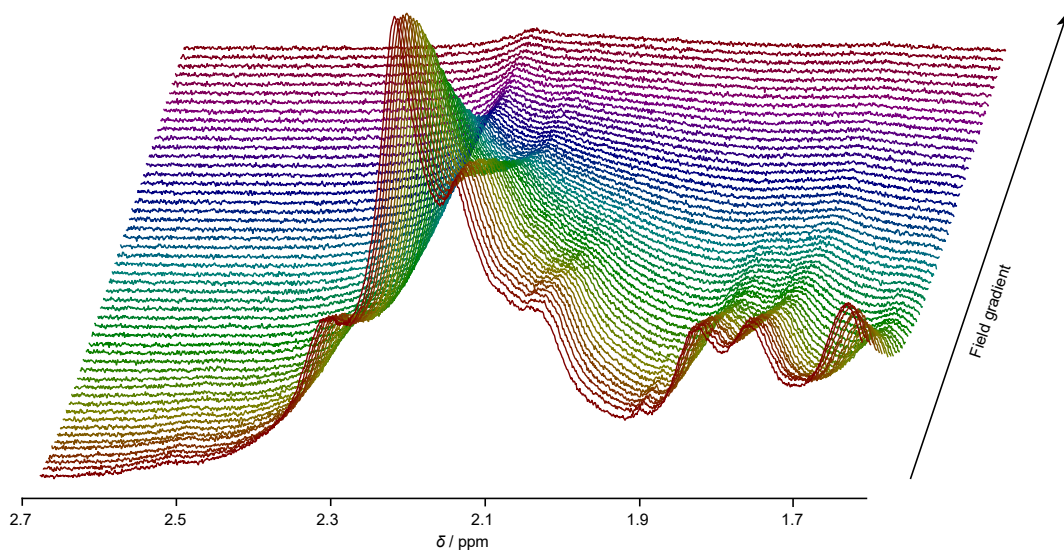

**Figure S13.** Stack plot of  $^1\text{H}$  NMR spectra obtained from the diffusion experiment for a 0.25:0.75:1 mixture of (*R*)-**1**, (*S*)-**1** and **2** in chloroform-*d* at the concentration of  $30 \text{ mmol L}^{-1}$ , showing the methyl protons of calix[5]arene moieties of (*R*),(*S*)-mixture of **1**.

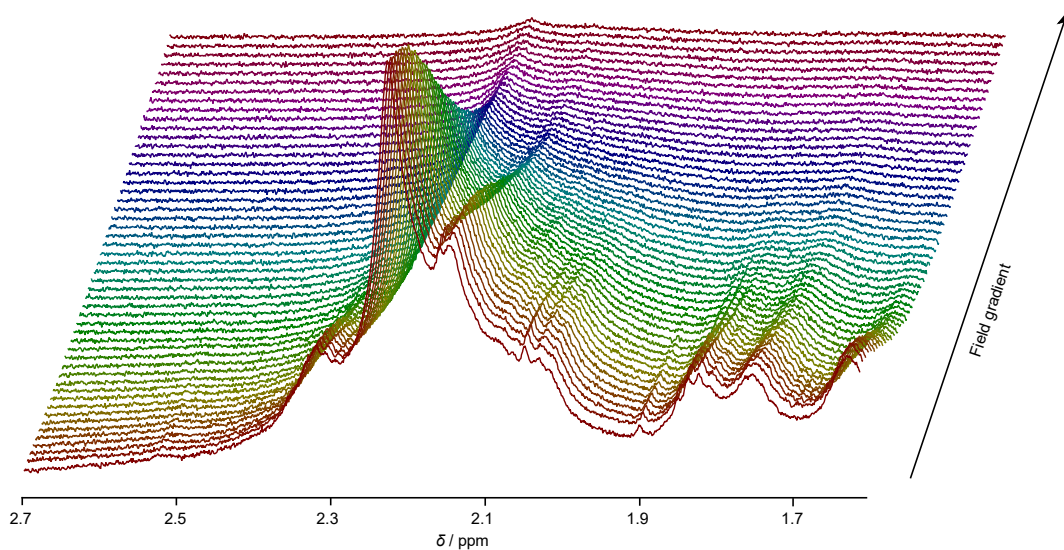

**Figure S14.** Stack plot of  $^1\text{H}$  NMR spectra obtained from the diffusion experiment for a 0.25:0.75:1 mixture of (*R*)-**1**, (*S*)-**1** and **2** in chloroform-*d* at the concentration of  $15 \text{ mmol L}^{-1}$ , showing the methyl protons of calix[5]arene moieties of (*R*),(*S*)-mixture of **1**.

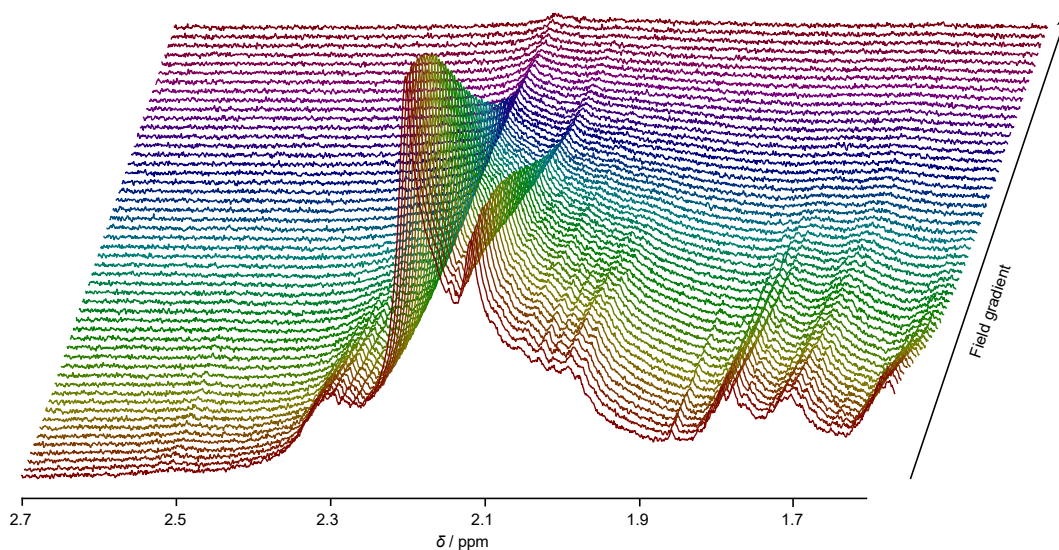

**Figure S15.** Stack plot of  $^1\text{H}$  NMR spectra obtained from the diffusion experiment for a 0.25:0.75:1 mixture of (*R*)-**1**, (*S*)-**1** and **2** in chloroform-*d* at the concentration of  $5.0 \text{ mmol L}^{-1}$ , showing the methyl protons of calix[5]arene moieties of (*R*),(*S*)-mixture of **1**.

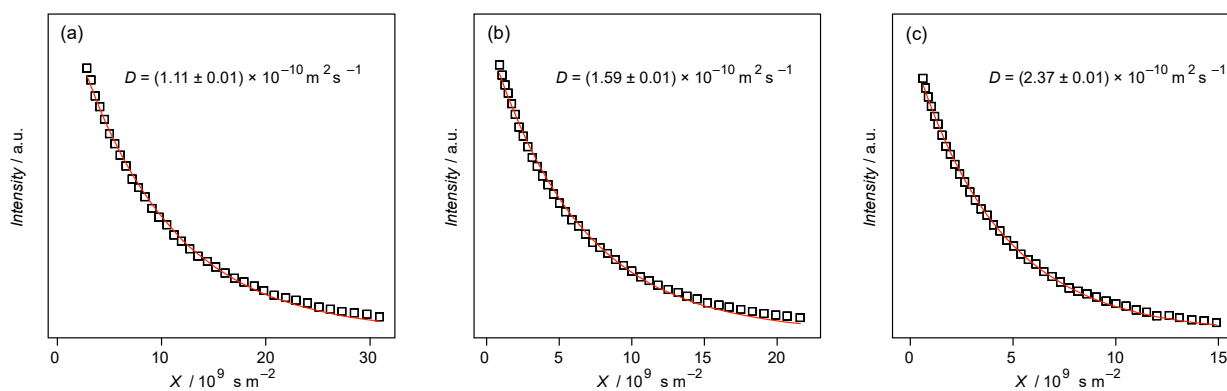

**Figure S16.** Plot of  $^1\text{H}$  NMR signal intensities obtained from the diffusion experiments (Figs. S13-S15) and their fitting curves (red lines) for a 0.25:0.75:1 mixture of (*R*)-**1**, (*S*)-**1** and **2** in chloroform-*d* at the concentrations of (a) 30, (b) 15, and (c)  $5.0 \text{ mmol L}^{-1}$ .

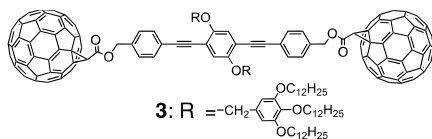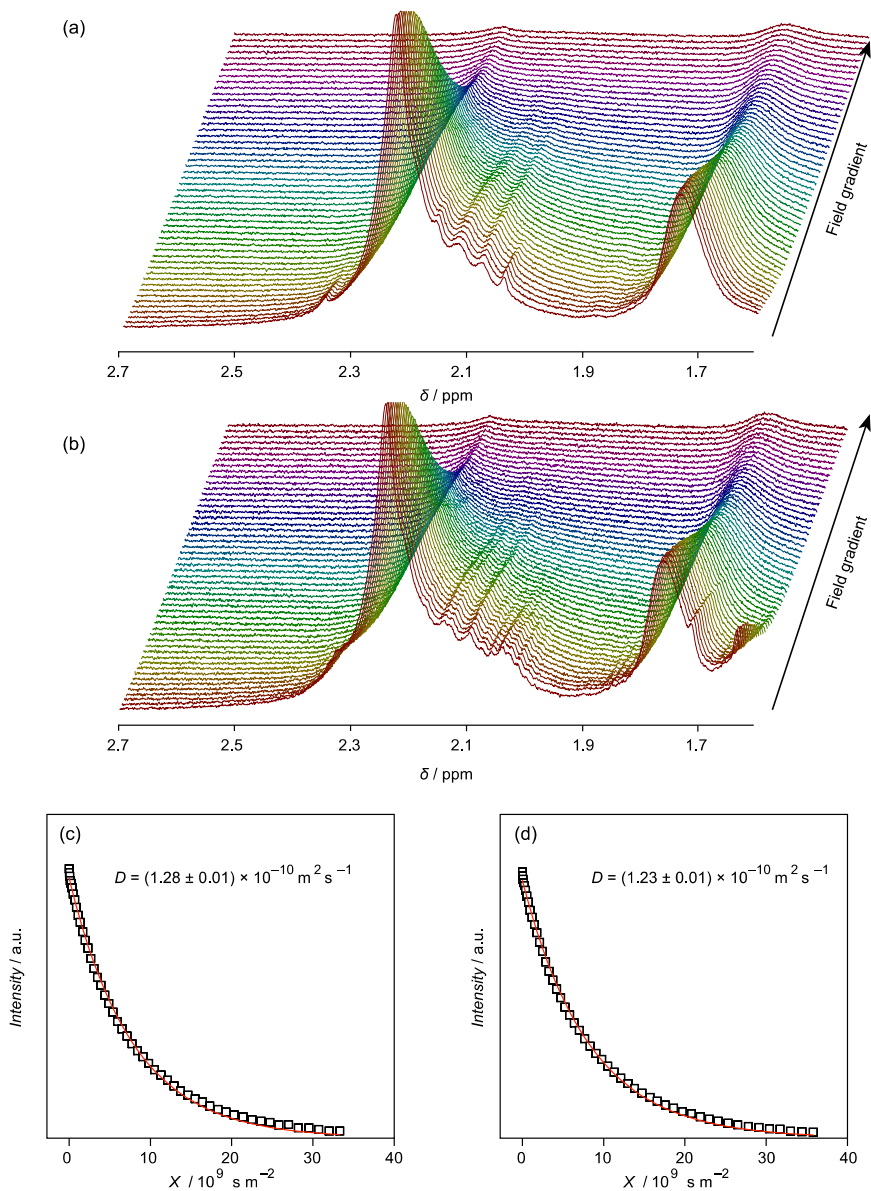

**Figure S17.** Stack plot of  $^1\text{H}$  NMR spectra obtained from the diffusion experiment for 1:1 mixtures of (a) (*rac*)-**1** and **3** and (b) (*R*)-**1** and **3** in chloroform-*d* at the concentration of  $15 \text{ mmol L}^{-1}$ , showing the methyl protons of calix[5]arene moieties of (*rac*)-**1** and (*R*)-**1**, respectively. Plots of  $^1\text{H}$  NMR signal intensities obtained from the diffusion experiments (panel a and b) and their fitting curves (red lines) for 1:1 mixtures (c) (*rac*)-**1** and **3** and (d) (*R*)-**1** and **3**.

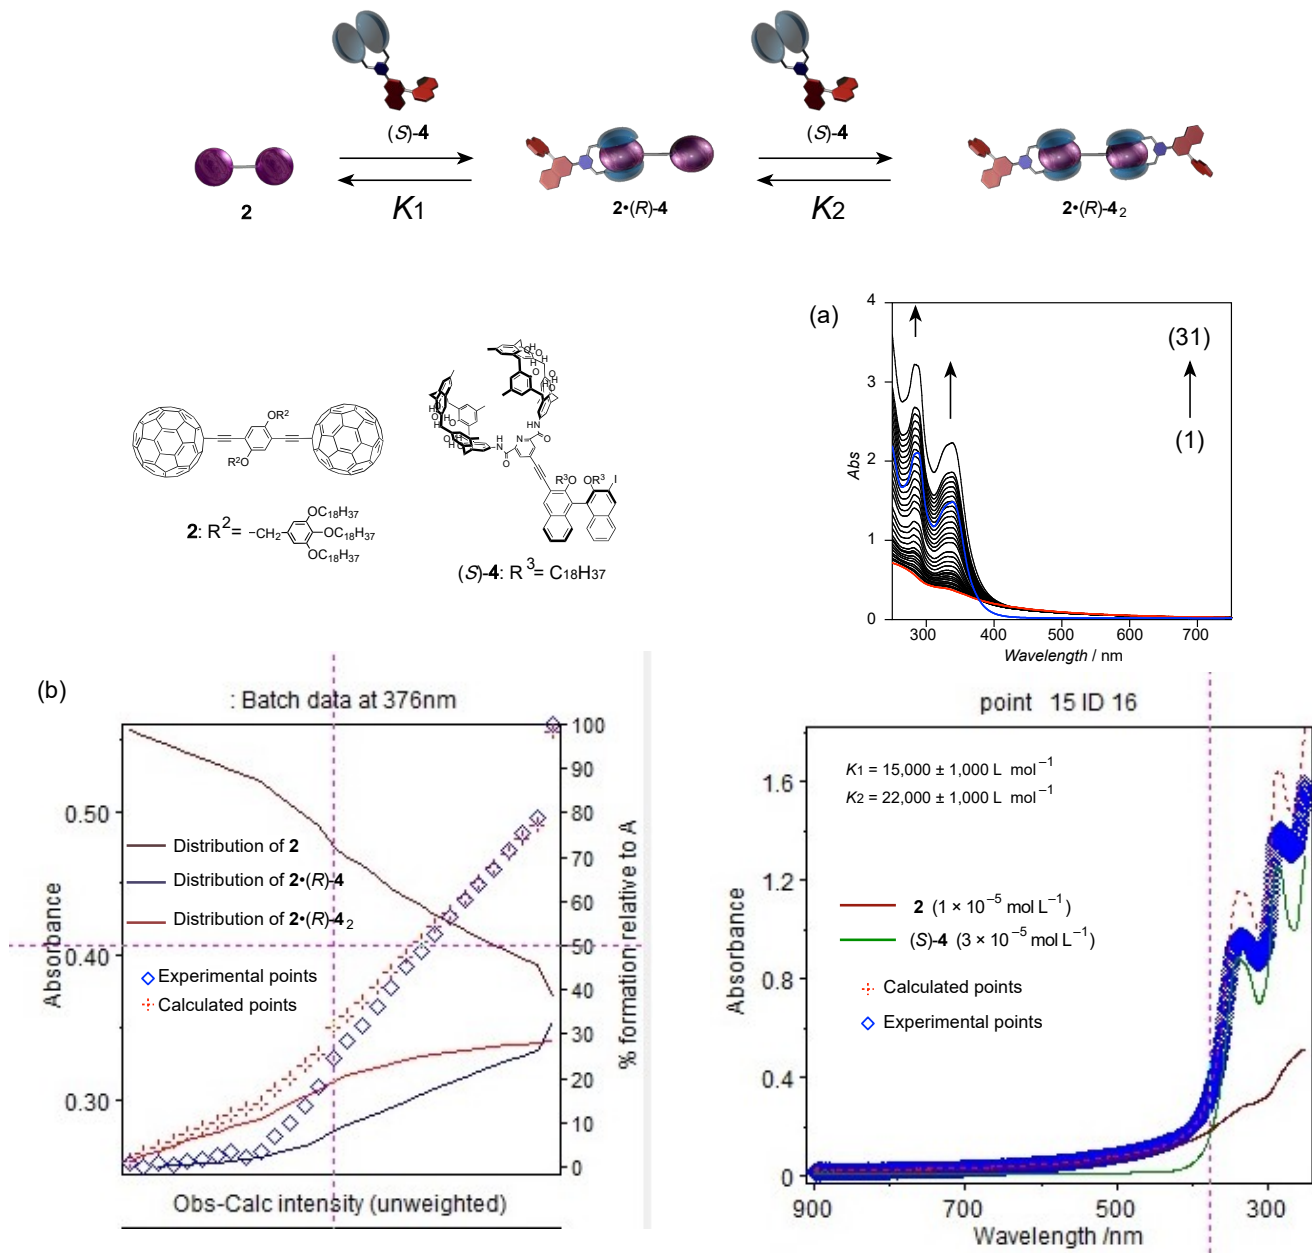

**Figure S18.** (a) Changes in the UV/vis absorption spectrum of **2** ( $1.0 \times 10^{-5} \text{ mol L}^{-1}$ ) seen upon the addition of  $(S)-4$ . Concentrations of  $(S)-4$  are (1-31): 0.00, 0.10, 0.20, 0.30, 0.40, 0.51, 0.61, 0.70, 0.82, 0.91, 1.0, 1.2, 1.4, 1.6, 1.8, 2.2, 2.4, 2.6, 2.8, 3.1, 3.3, 3.5, 3.7, 3.9, 4.1, 4.3, 4.5, 4.7, 4.8, 5.0,  $6.0 \times 10^{-5} \text{ mol L}^{-1}$ . The red and blue lines correspond to the UV/vis absorption spectra of **2** ( $3.1 \times 10^{-5} \text{ mol L}^{-1}$ ) and  $(S)-4$  ( $1.0 \times 10^{-5} \text{ mol L}^{-1}$ ), respectively. (b) Images exported from HypSpec Graphs<sup>[12]</sup> showing the fitting over the whole spectrum.

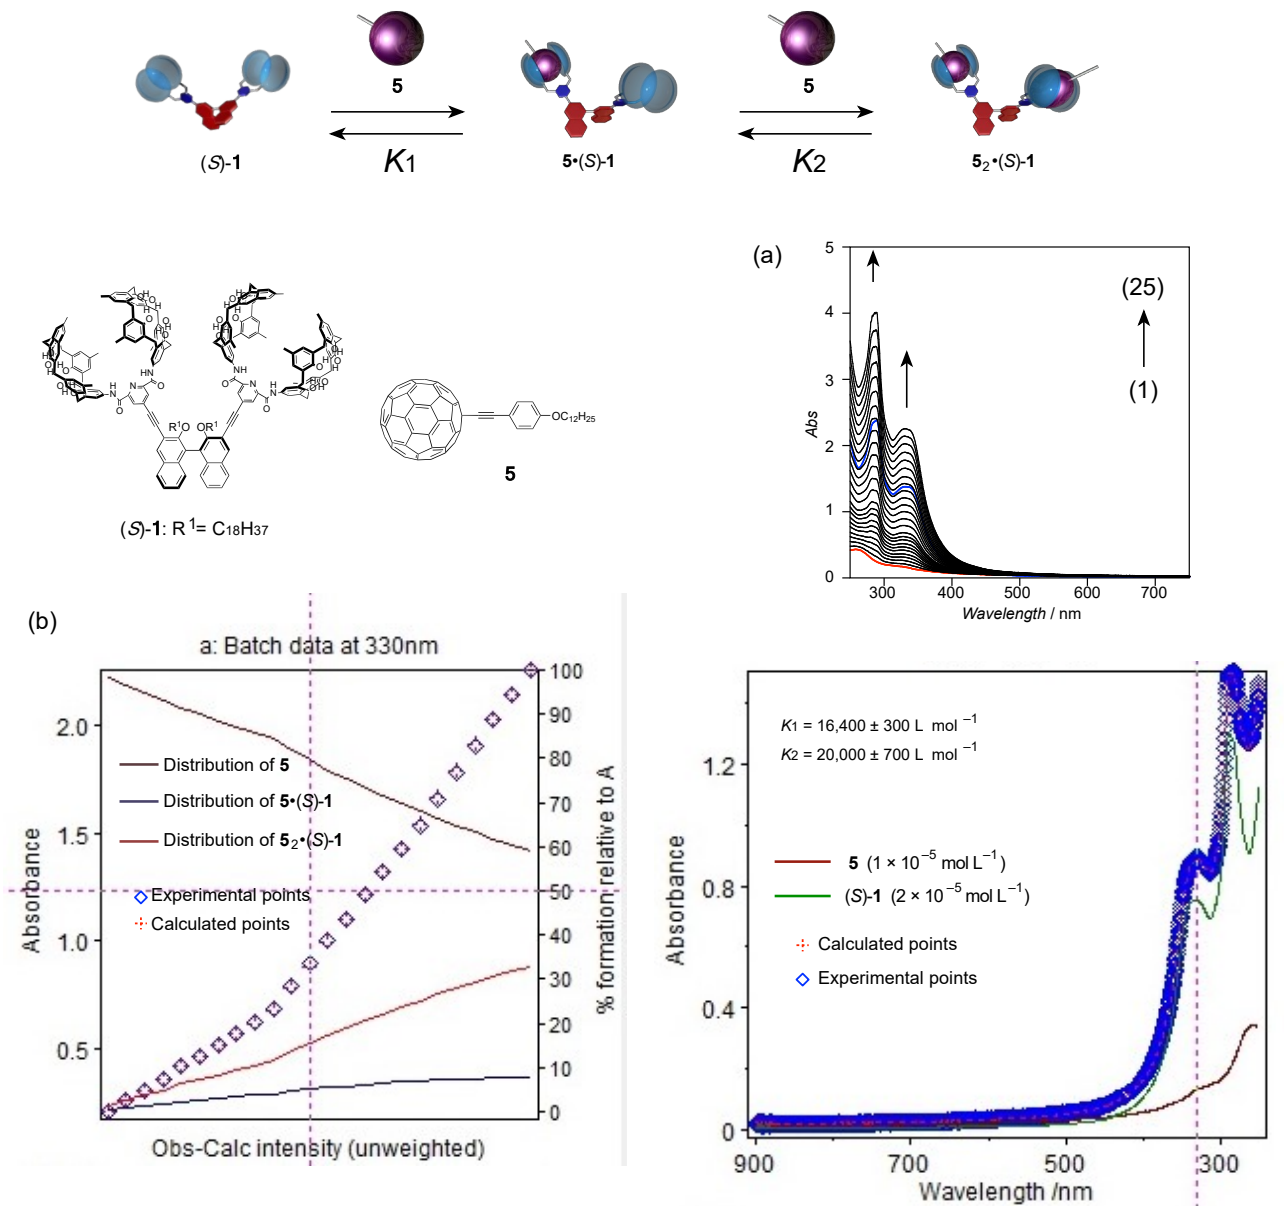

**Figure S19.** (a) Changes in the UV/vis absorption spectrum of **5** ( $1.0 \times 10^{-5} \text{ mol L}^{-1}$ ) seen upon the addition of **(S)-4**. Concentrations of **(S)-1** are (1-25): 0.00, 0.10, 0.19, 0.29, 0.38, 0.49, 0.59, 0.68, 0.79, 0.87, 0.98, 1.2, 1.4, 1.6, 1.8, 2.0, 2.1, 2.3, 2.5, 2.7, 3.0, 3.2, 3.4, 3.6,  $3.8 \times 10^{-5} \text{ mol L}^{-1}$ . The red and blue lines correspond to the UV/vis absorption spectra of **5** ( $2.2 \times 10^{-5} \text{ mol L}^{-1}$ ) and **(S)-1** ( $1.0 \times 10^{-5} \text{ mol L}^{-1}$ ), respectively. (b) Images exported from HypSpec Graphs<sup>[12]</sup> showing the fitting over the whole spectrum.



## References:

- [1]: T. Hirao, Y. Iwabe, N. Fujii, T. Haino, *J. Am. Chem. Soc.*, 2021, **143**, 4339–4345.
- [2]: T. Hirao, M. Tosaka, S. Yamago, T. Haino, *Chem. –Eur. J.*, 2014, **20**, 16138-16146.
- [3]: T. Hirao, Y. Iwabe, N. Hisano, T. Haino, *Chem. Commun.*, 2020, **56**, 6672-6675.
- [4]: J. S. Park, K. Y. Yoon, D. S. Kim, V. M. Lynch, C. W. Bielawski, K. P. Johnston and J. L. Sessler, *Proc. Natl. Acad. Sci. U. S. A.*, 2011, **108**, 20913–20917.
- [5]: L. Escobar, Y.-S. Li, Y. Cohen, Y. Yu, J. Rebek Jr. and P. Ballester, *Chem. –Eur. J.*, 2020, **26**, 8220–8225.
- [6]: M. M. Tirado and J. G. J. de la Torre, *J. Chem. Phys.*, 1979, **71**, 2581–2587.
- [7]: M. M. Tirado and J. G. J. de la Torre, *J. Chem. Phys.*, 1980, **73**, 1986–1993.
- [8]: M. M. Tirado, C. L. Martínez and J. G. J. de la Torre, *J. Chem. Phys.*, 1984, **81**, 2047–2052.
- [9]: A. Ortega and G. J. de la Torre, *J. Chem. Phys.*, 2003, **119**, 9914–9919.
- [10]: A. Wong, R. Ida, L. Spindler and G. Wu, *J. Am. Chem. Soc.*, 2005, **127**, 6990–6998.
- [11]: Y. Yamauchi, Y. Hanaoka, M. Yoshizawa, M. Akita, T. Ichikawa, M. Yoshio, T. Kato and M. Fujita, *J. Am. Chem. Soc.*, 2010, **132**, 9555–9557.
- [12]: P. Gans, A. Sabatini, A. Vacca, *Talanta* 1996, **43**, 1739–1753.
